# Supplementary material
Source: PubMed Central journal article supplement (PMC1761976)
Supplement: plntphys_pp.106.090860_2.pdf [file plntphys_pp.106.090860_2.pdf]

10 20 30 40 50 60 70 80 90 100

AGL24 MA--REKIRIKKIDNITARQVTFKRRRGIFFKKADEL SVLCDADVALIIFSATGKLF EFSSSRMRDILGRYSLHASNINKLMDPPSTHLRL--ENCNLSRL

SVP MA--REKIQIRKIDNATARQVTFKRRRGLFKKAEEL SVLCDADVALIIFSSTGKLF EFCSSSMKEVLERHNLQSKNLEKLD-QPSLELQLVENS DHARM

BM10 MA--RERREIKRIESAAARQVTFKRRRGLFKKAEEL SVLCDADVALIVFSSTGKLSQFASSMNEIIDKYSTH SKNLGKTD-QPTLDLNL--EHSKYANL

HvVRT2 MA--RERRAIRRIESAAARQVTFKRRRGLFKKAEELAVLCDADVALVVFSSSTGKLSQFASSMNEIIDKYSTH SKNLGKSDQQPAIDLNL--EHCKYDSL

BM1 MAGKRERIAIRRIENLAARQVTFKRRRGLFKKAEELSILCDAEVLAVFSATGKLFQFASSMNOIIDRYNSH SKILKKVDEPSQLDLH--EDSNCARL

110 120 130 140 150 160 170 180 190 200

AGL24 SKEVEDKTKQLRKIRGEDLDGLNLEELQRLEKLLSGLSRVSEKKGECVMSQIFSLEKRGSELVDENKRLRDKLETLERAK-----

SVP SKEIADKSHRLRQMRGEELQGLDIEELQQLLEKALETGLTRVIETKSDKIMSEISELQKGMQLMDENKRLRQOGTQLTEENERLGMQICNNVHAHGGAES

BM10 NDQLAEASLRLRQMRGEELQGLSVDELQQLLEKNLETGLHKVLQTKDQQFLEQINELHRKSSQLAEENKCLRNOVAQVPTA----GKLVVVDTEN-----

HvVRT2 NEQLAEASLRLRHMRGEELDGLSVGELQOMEKNLETGLQRVLCTKDRQFMQQISDLQKGTQLAEENMRLKNQMHEVPTA----SMVAVAD-----

BM1 RDELAEASLWLQOMRGEELQSLNVQQLQALEKSLESGLSSVLKTKSQKIMDQISELEKKRVQLIEENARLKEQASKM-----EMQVAADPLV-----

210 220 230 240

AGL24 --LTTLKEALETESVTTNVSSYDSGTPLEDDSDTSLKLG LPSWE--

SVP ENAAVYEEGQSSESITNAGNSTGA-PVDSSESSDTSLRLGLPYGG--

BM10 ---VIAEDGQSSESVM TALHSGSS-QDNDDGSDVSLKLALPWK---

HvVRT2 ---VVPEDVHSSDSVMTAVHSASS-QDNDDGSDI SLKLALPWK---

BM1 ---VVYDEGQSSESVTNTSYPRPP-LDTE DSSDTSLRLGLSLFNSK
