# Supplementary material
Source: PubMed Central journal article supplement (PMC1761976)

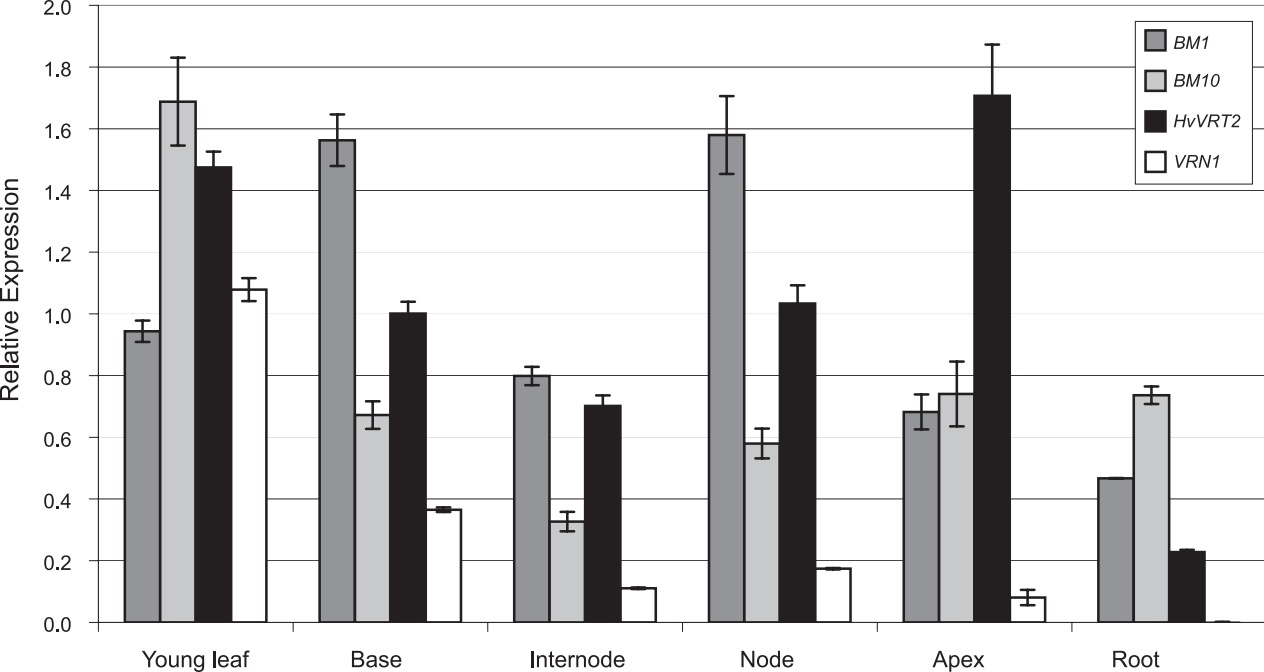

Supplement: plntphys_pp.106.090860_3.pdf [file plntphys_pp.106.090860_3.pdf]
